# Supplementary material for: Associations Between Screen Exposure in Early Life and Myopia amongst Chinese Preschoolers
Source: PubMed Central journal article supplement (PMC7037286; doi:10.3390/ijerph17031056), 2020-02-07
Supplement: ijerph-17-01056-s001.pdf [file ijerph-17-01056-s001.pdf]

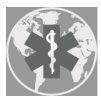

Supplementary Material:

**Table S1.** Association between initial age of exposure to handheld electronic devices and myopia.

| Initial Age of Exposure (Years) | No. Of Children | No. of Case | Myopia Prevalence (%) | PR (95% CI)           | Adjusted PR <sup>a</sup> (95% CI) | Adjusted PR <sup>b</sup> (95% CI) |
|---------------------------------|-----------------|-------------|-----------------------|-----------------------|-----------------------------------|-----------------------------------|
| No exposure                     | 1911            | 19          | 1.0                   | 1.00                  | 1.00                              | 1.00                              |
| 0 to 1                          | 4916            | 221         | 4.5                   | 4.91 (3.07, 7.84) *** | 4.91 (3.07, 7.85) ***             | 4.41 (2.19, 8.90) ***             |
| 1 to 2                          | 4683            | 99          | 2.1                   | 2.38 (1.46, 3.89) **  | 2.38 (1.45, 3.89) **              | 2.46 (1.20, 5.06) *               |
| 2 to 3                          | 4805            | 84          | 1.7                   | 1.83 (1.11, 3.02) *   | 1.84 (1.12, 3.03) *               | 2.02 (0.97, 4.17)                 |
| After 3                         | 5978            | 104         | 1.7                   | 1.36 (0.84, 2.22)     | 1.41 (0.86, 2.31)                 | 1.78 (0.87, 3.65)                 |

<sup>a</sup>: Adjusted for children’s age, gender, feeding patterns, and premature birth; parental age at childbirth, education level, visual conditions and monthly household income. <sup>b</sup>: Adjusted for a + exposure to television/laptop/computer; \*:  $p < 0.05$ ; \*\*:  $p < 0.01$ ; \*\*\*:  $p < 0.001$ .

**Table S2.** Association between the initial age of television/laptop/computer screen exposure and myopia.

| Initial Age of Exposure (Years) | No. Of Children | No. of Case | Myopia Prevalence (%) | PR (95% CI)           | Adjusted PR <sup>a</sup> (95% CI) | Adjusted PR <sup>b</sup> (95% CI) |
|---------------------------------|-----------------|-------------|-----------------------|-----------------------|-----------------------------------|-----------------------------------|
| No exposure                     | 1911            | 19          | 1.0                   | 1.00                  | 1.00                              | 1.00                              |
| 0 to 1                          | 7291            | 300         | 4.1                   | 4.15 (2.61, 6.60) *** | 4.20 (2.64, 6.69) ***             | 3.34 (2.00, 5.56) ***             |
| 1 to 2                          | 5486            | 116         | 2.1                   | 2.20 (1.35, 3.57) **  | 2.22 (1.36, 3.61) **              | 2.02 (1.19, 3.43) *               |
| 2 to 3                          | 3868            | 69          | 1.8                   | 1.74 (1.05, 2.90) *   | 1.78 (1.07, 2.95) *               | 1.82 (1.05, 3.15) *               |
| After 3                         | 7141            | 89          | 2.3                   | 1.11 (0.68, 1.82)     | 1.13 (0.69, 1.85)                 | 1.17 (0.69, 1.98)                 |

<sup>a</sup>: Adjusted for children’s age, gender, feeding patterns, and premature birth; parental age at childbirth, education level, visual conditions and monthly household income. <sup>b</sup>: Adjusted for a + exposure to handheld electronic devices; \*:  $p < 0.05$ ; \*\*:  $p < 0.01$ ; \*\*\*:  $p < 0.001$ .
